# Supplementary material for: The role of uterus mitochondrial function in high-fat diet-related adverse pregnancy outcomes and protection by resveratrol
Source: Royal Society of Chemistry journal article supplement (doi:10.1039/d4fo00671b), 2024-01-01
Supplement: d4fo00671b1.pdf [file d4fo00671b1.pdf]

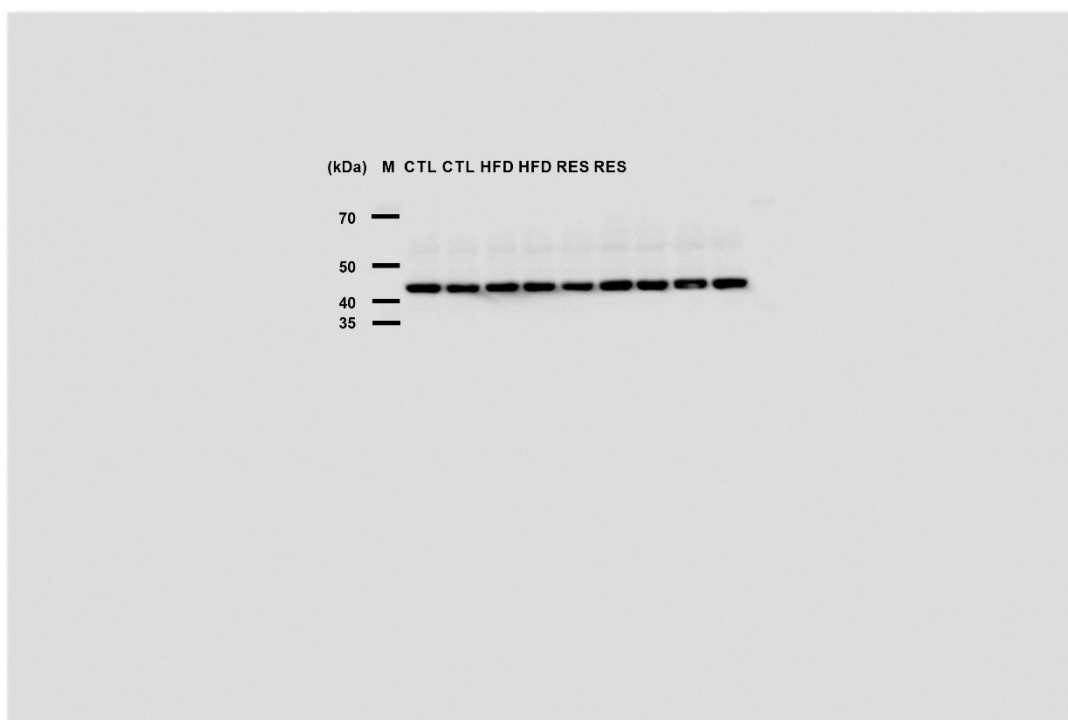

**Fig 3C.  $\beta$ -actin**

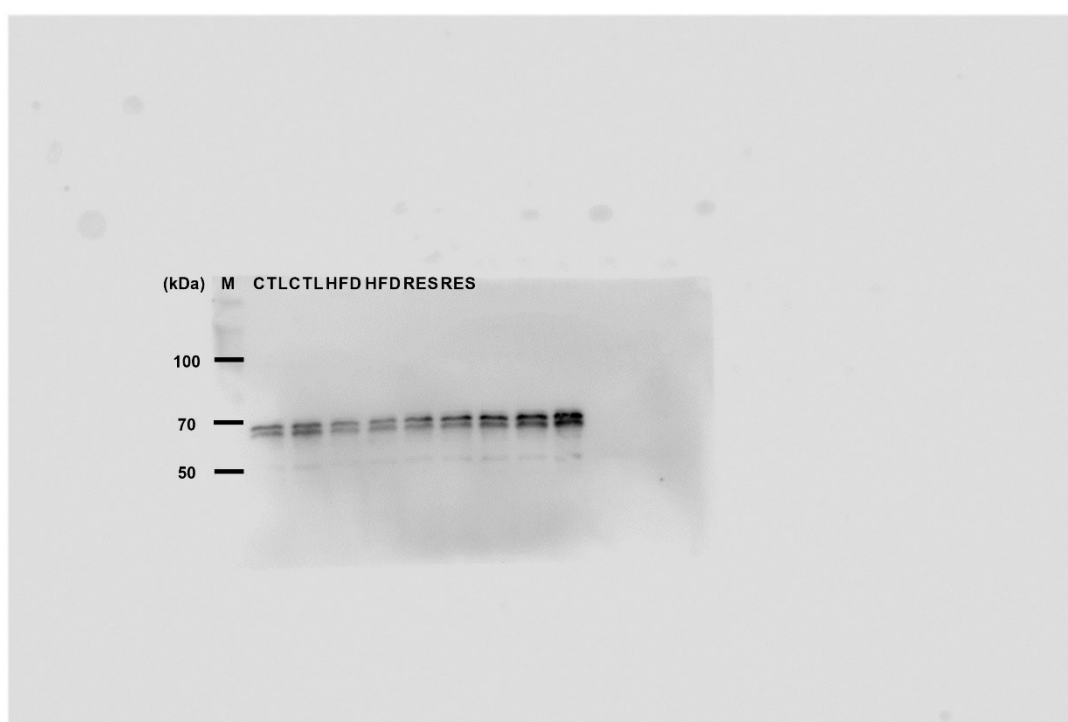

**Fig 3C. Nrf1**

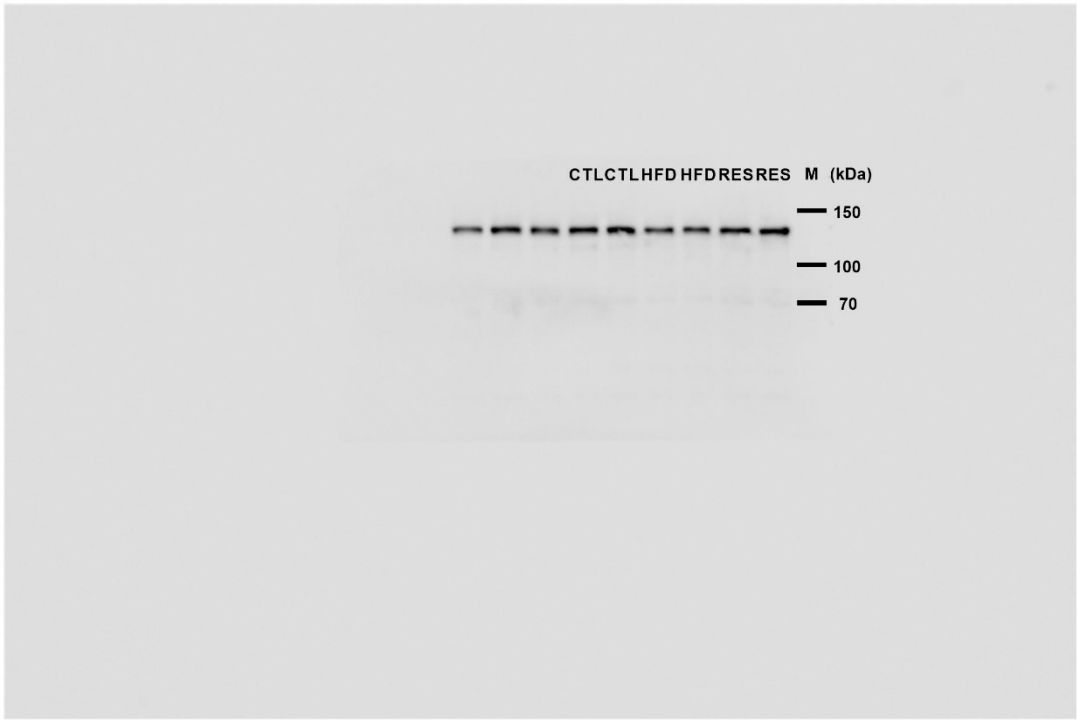

**Fig 3C. PGC-1 $\alpha$**

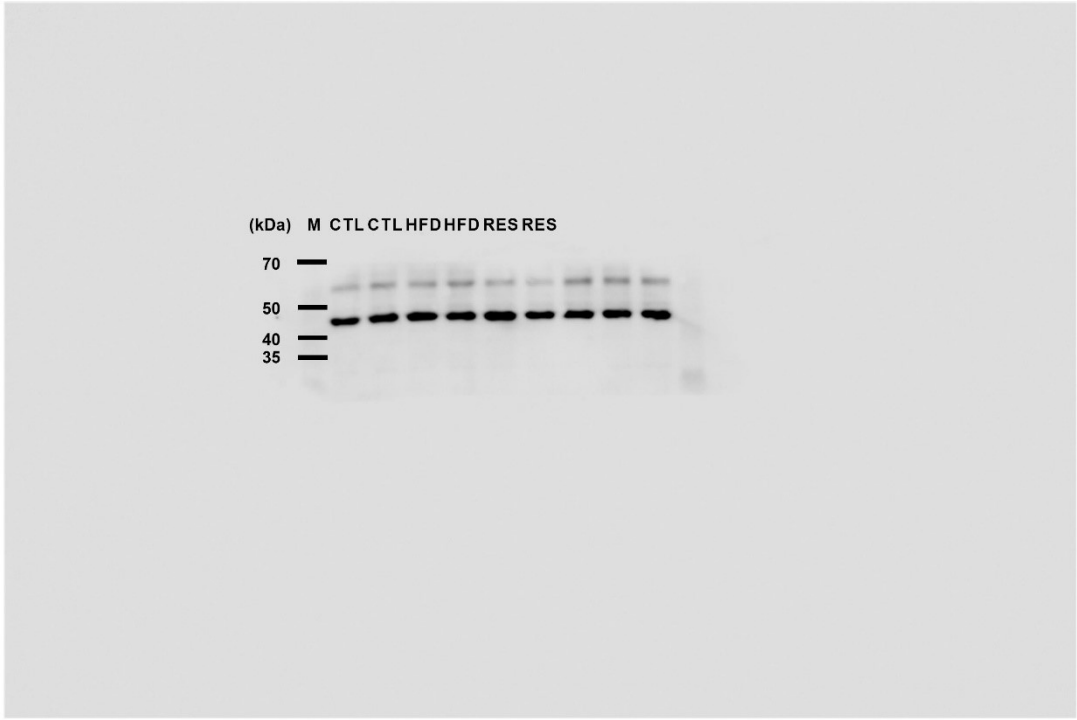

**Fig 3F.  $\beta$ -actin**

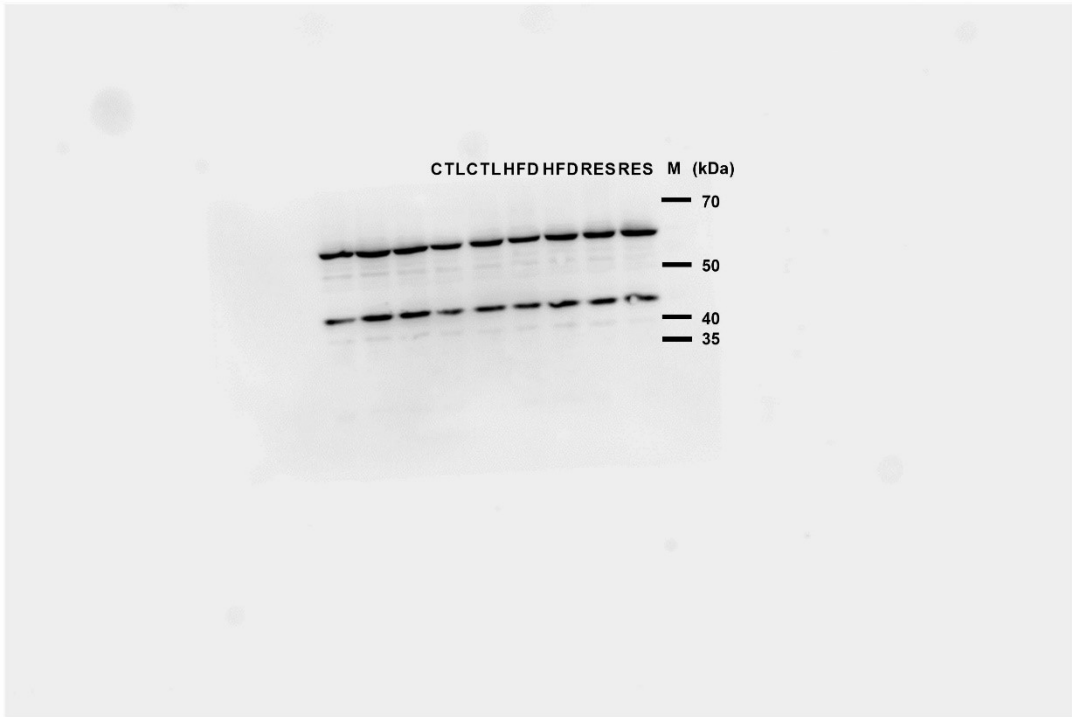

**Fig 3F. AMPK**

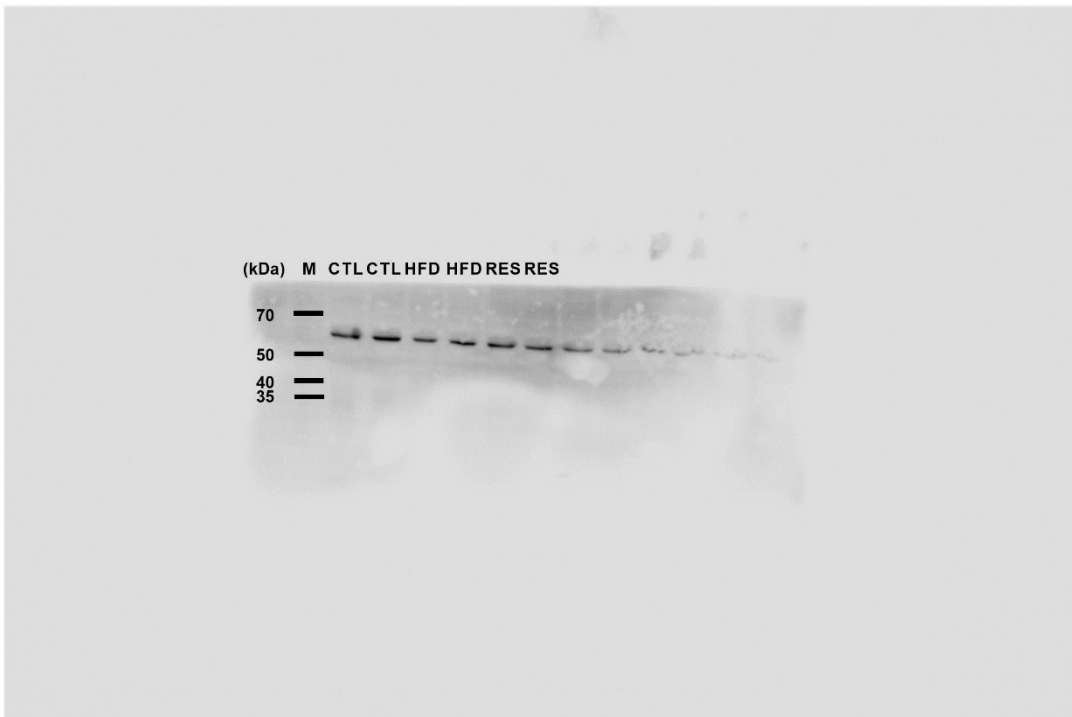

**Fig 3F. p-AMPK**

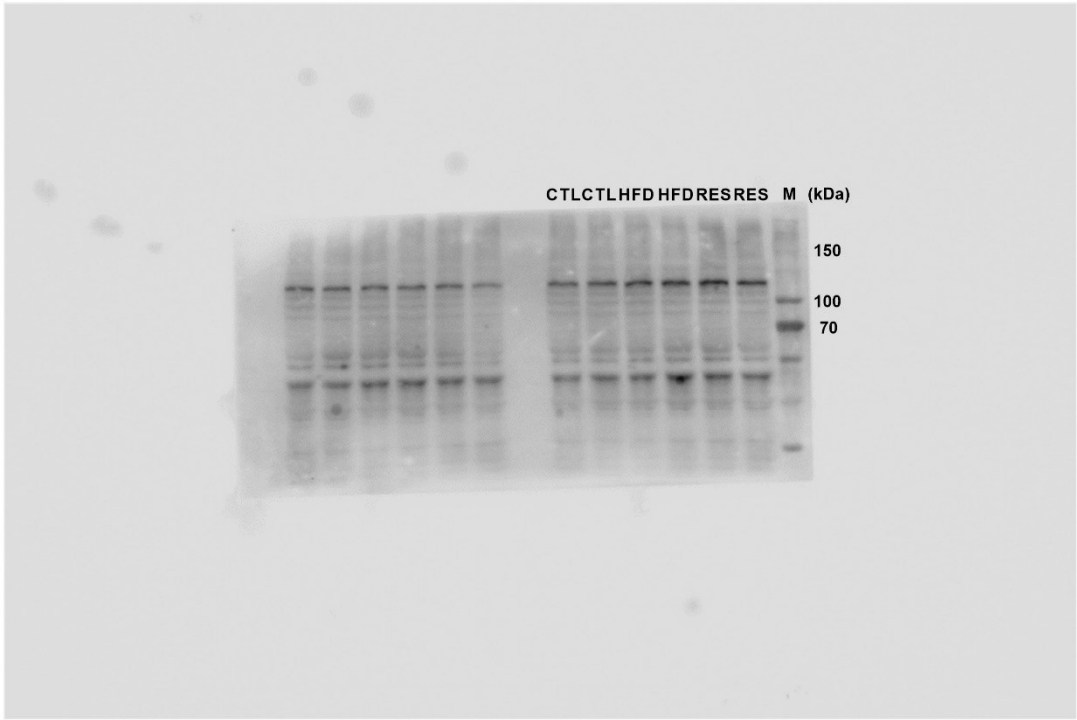

**Fig 3F. Sirt1**

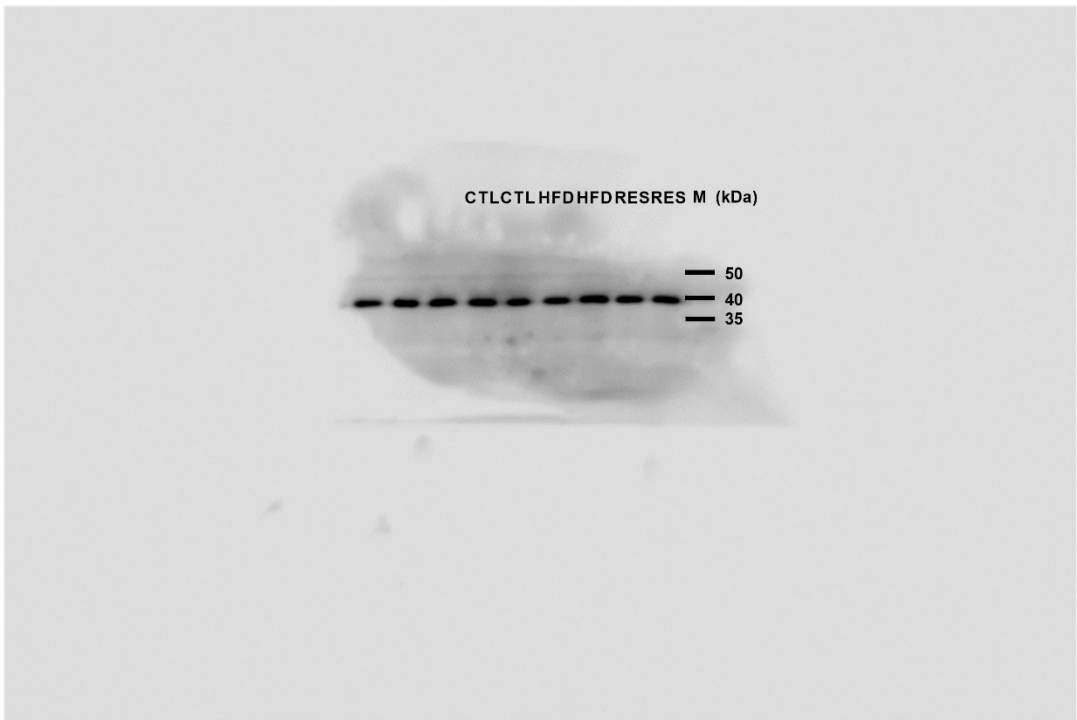

**Fig 3I. p38**

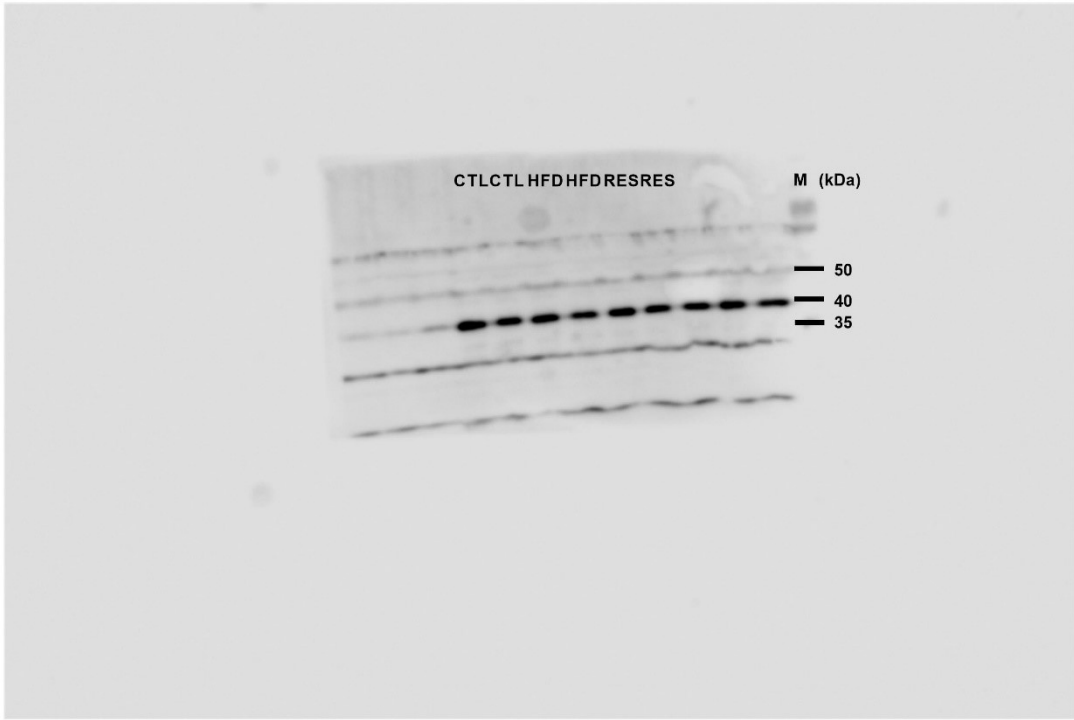

**Fig 3I. p-p38**

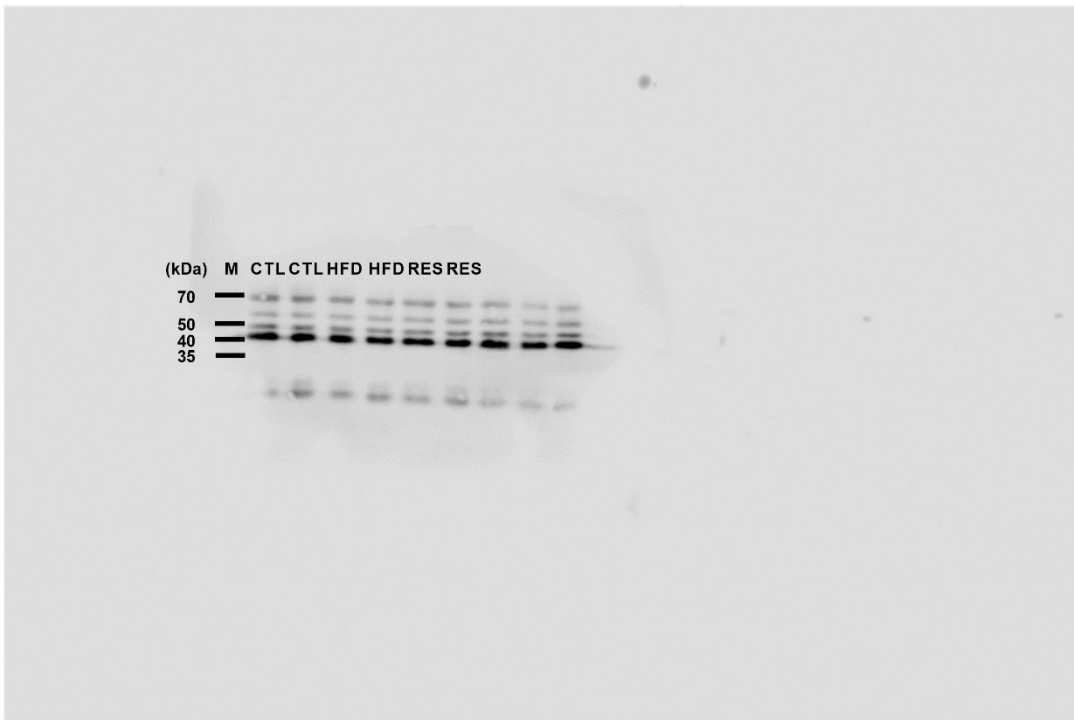

**Fig 3I. ERK**

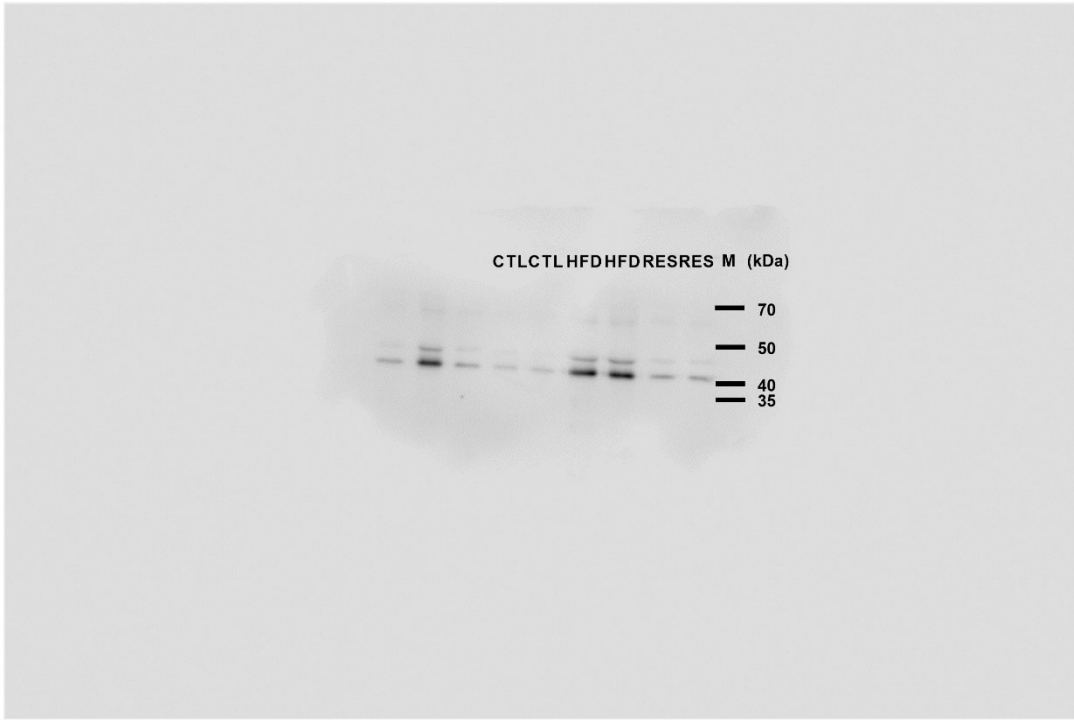

**Fig 3I. p-ERK**

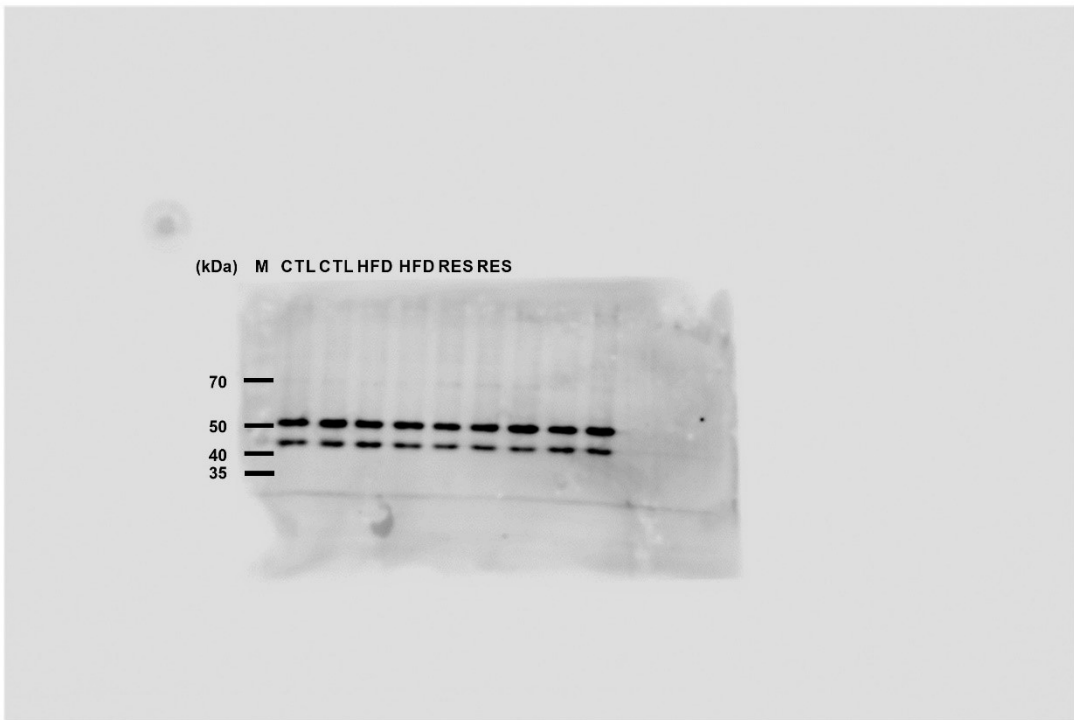

**Fig 3I. JNK**

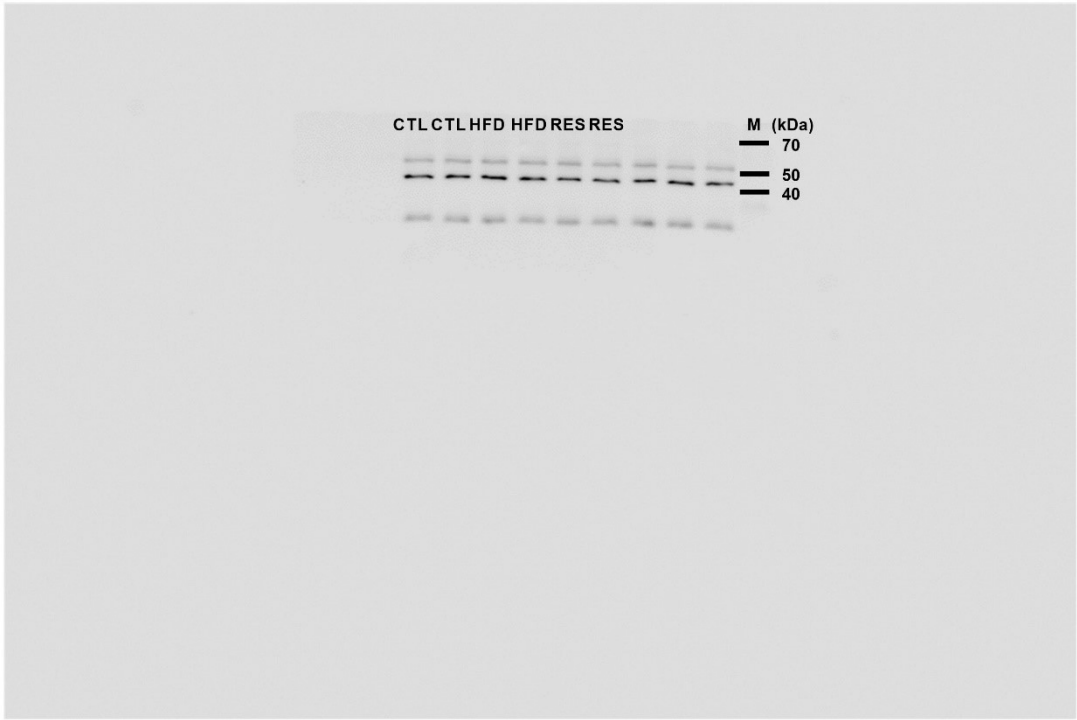

Fig 3I. p-JNK

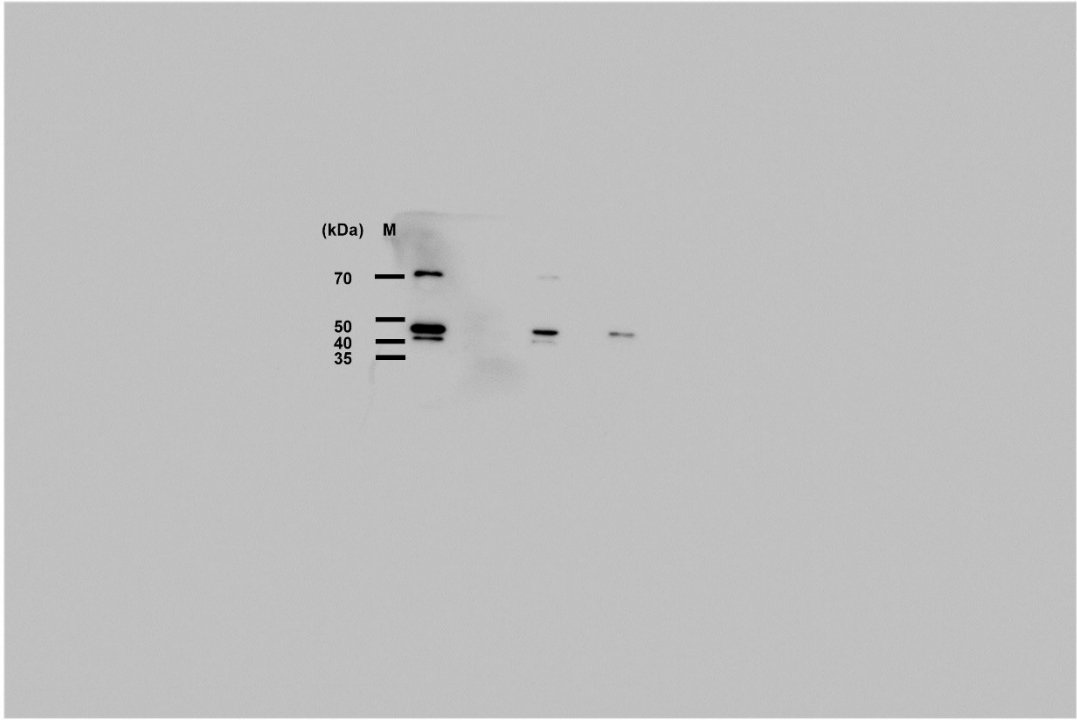

Fig 4A.

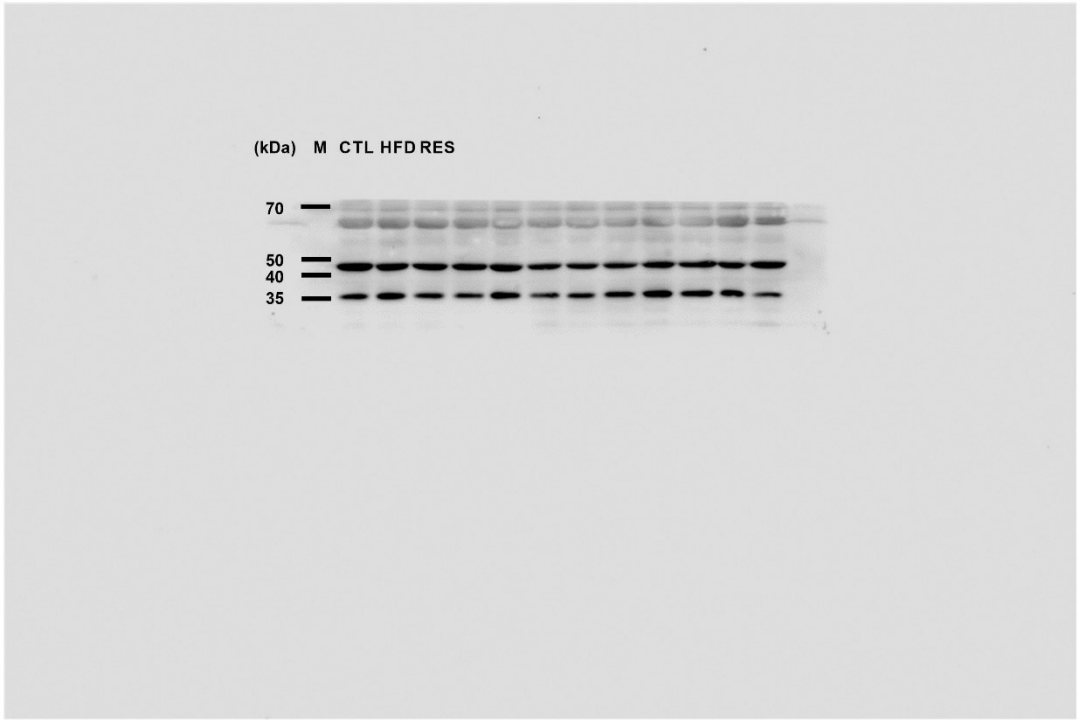

Supplementary fig 4A.  $\beta$ -actin

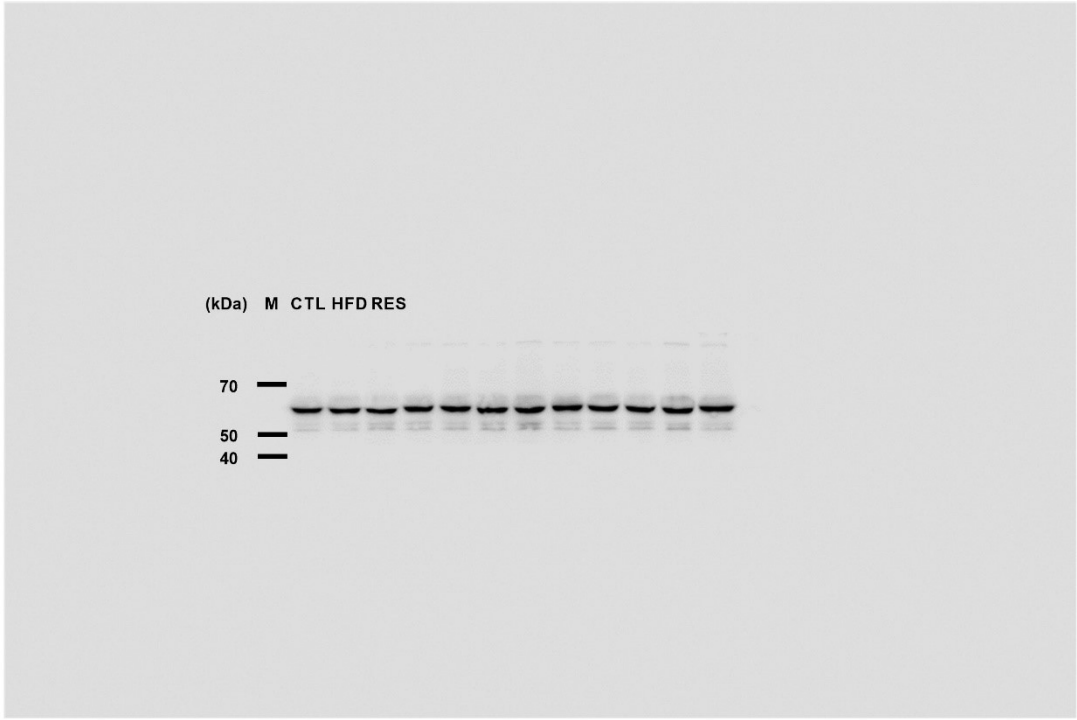

Supplementary fig 4A. AMPK



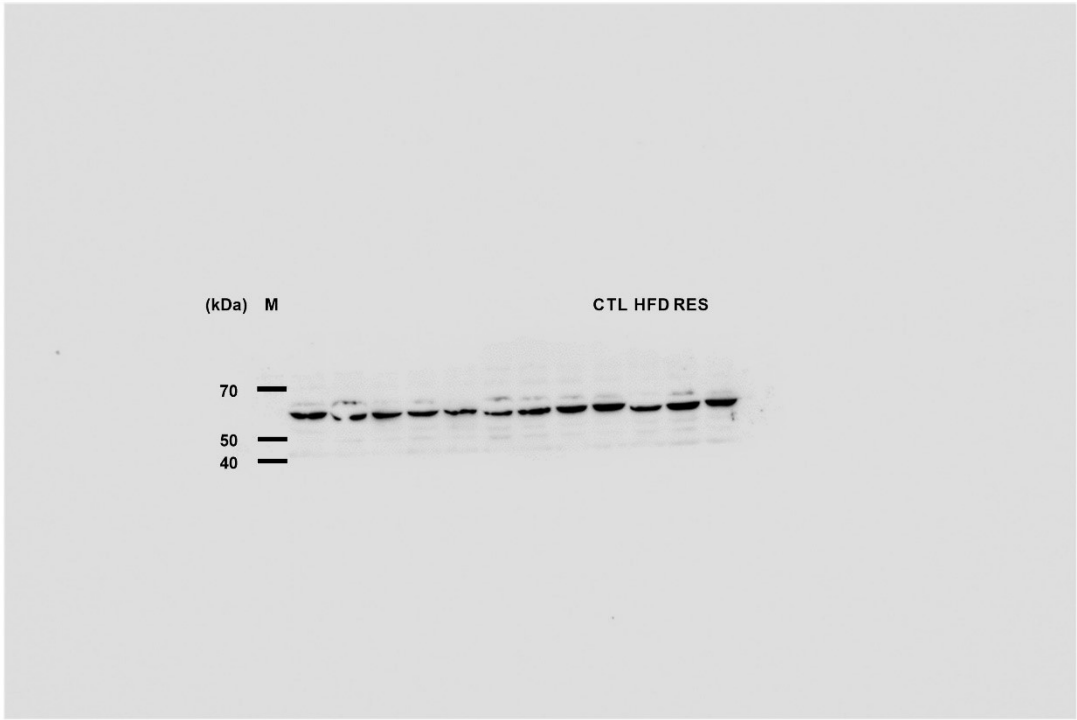

Supplementary fig 4A. p-AMPK

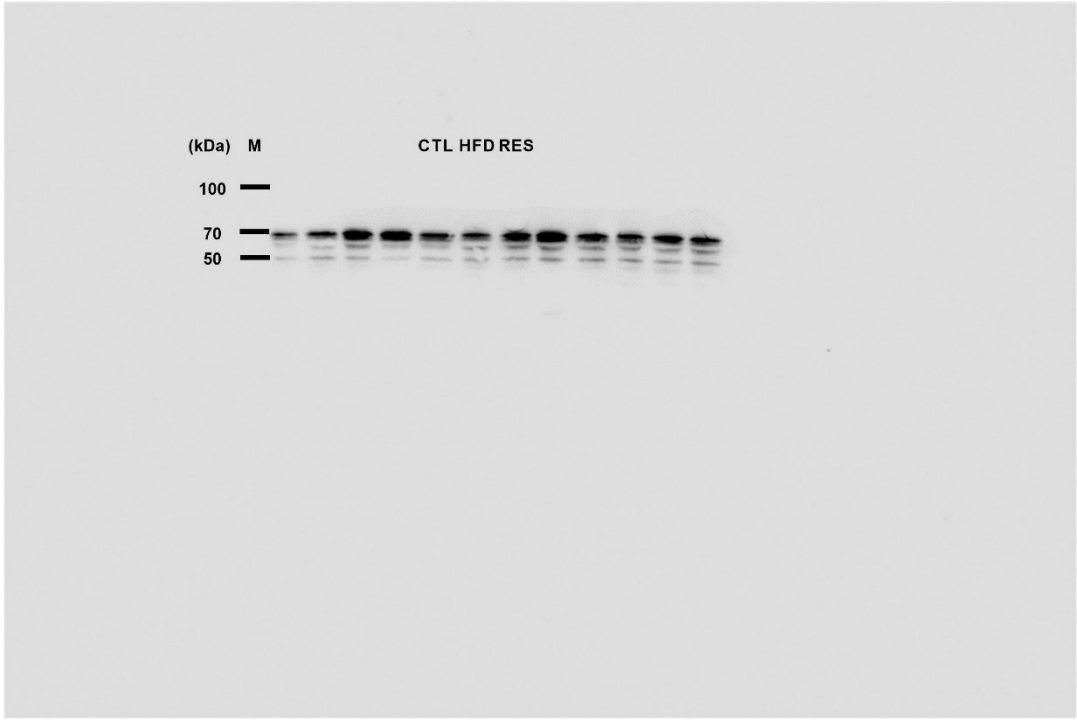

Supplementary fig 4A. Nrf1

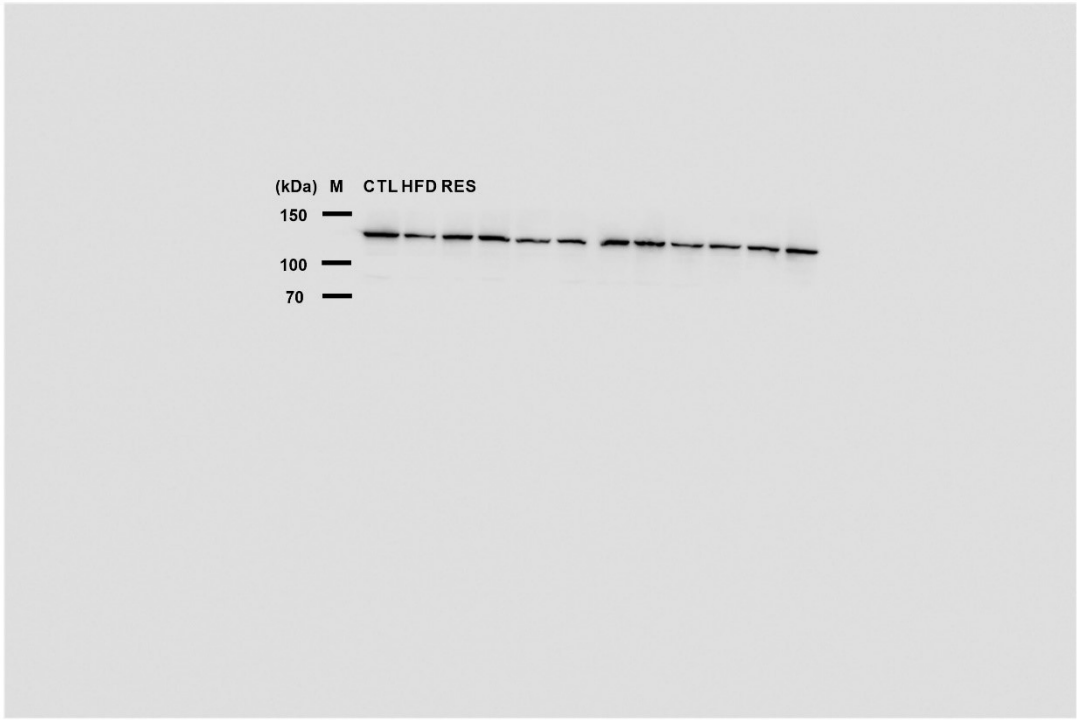

**Supplementary fig 4A. PGC-1 $\alpha$**
