# Supplementary material for: The role of uterus mitochondrial function in high-fat diet-related adverse pregnancy outcomes and protection by resveratrol
Source: Royal Society of Chemistry journal article supplement (doi:10.1039/d4fo00671b), 2024-01-01
Supplement: d4fo00671b2.pdf [file d4fo00671b2.pdf]

1    **Supplementary Materials**

2                    **Supplementary Table 1. Composition of the experimental diets**

| Item                    | CTL           |             | HFD           |             |
|-------------------------|---------------|-------------|---------------|-------------|
|                         | gm%           | kcal%       | gm%           | kcal%       |
| Protein                 | 19.2          | 20          | 26.2          | 20          |
| Carbohydrate            | 67.3          | 70          | 26.3          | 20          |
| Fat                     | 4.3           | 10          | 34.9          | 60          |
| Total                   |               | 100         |               | 100         |
| kcal/gm                 | 3.85          |             | 5.24          |             |
| <b>Ingredient</b>       | <b>gm</b>     | <b>kcal</b> | <b>gm</b>     | <b>kcal</b> |
| Casein, 30 Mesh         | 200           | 800         | 200           | 800         |
| L-Cystine               | 3             | 12          | 3             | 12          |
| Corn Starch             | 506.2         | 2024.8      | 0             | 0           |
| Maltodextrin 10         | 125           | 500         | 125           | 500         |
| Sucrose                 | 68.8          | 275.2       | 68.8          | 275.2       |
| Cellulose, BW200        | 50            | 0           | 50            | 0           |
| Soybean Oil             | 25            | 225         | 25            | 225         |
| Lard*                   | 20            | 180         | 245           | 2205        |
| Mineral Mix S10026      | 10            | 0           | 10            | 0           |
| DiCalcium Phosphate     | 13            | 0           | 13            | 0           |
| Calcium Carbonate       | 5.5           | 0           | 5.5           | 0           |
| Potassium Citrate, 1H2O | 16.5          | 0           | 16.5          | 0           |
| Vitamin Mix V10001      | 10            | 40          | 10            | 40          |
| Choline Bitartrate      | 2             | 0           | 2             | 0           |
| FD%C Yellow Dye #5      | 0.04          | 0           | 0             | 0           |
| FD&C Blue Dye #1        | 0.01          | 0           | 0.05          | 0           |
| <b>Total</b>            | <b>773.85</b> | <b>4057</b> | <b>773.85</b> | <b>4057</b> |

- 3    \*Typical analysis of cholesterol in lard = 0.72 mg/gram.  
4    Cholesterol (mg)/4057 kcal = 216.4  
5    Cholesterol (mg)/kg = 279.6

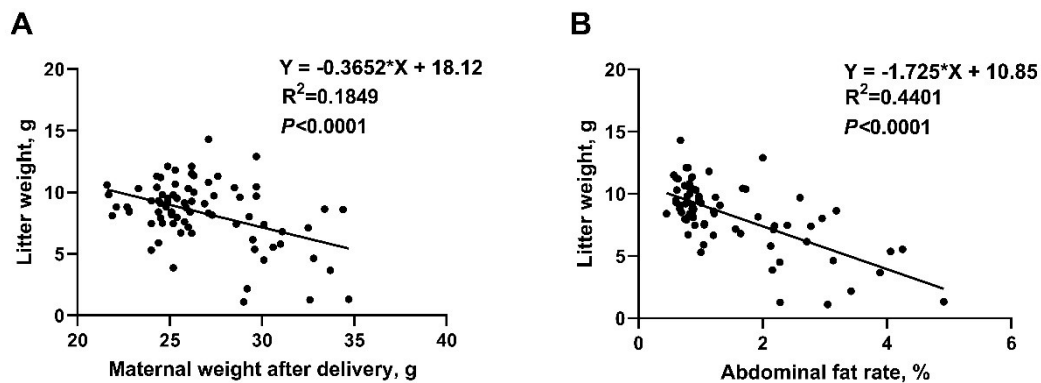

6    **Supplementary Fig 1.** Linear regression analysis of maternal weight and litter weight, abdominal

7 fat rate and litter weight after delivery. The linear regression analysis of maternal weight after  
8 delivery and litter weight (A), abdominal fat rate and litter weight (B). \* $P<0.05$ , \*\* $P<0.01$ ,  
9 \*\*\* $P<0.001$ , \*\*\*\* $P<0.0001$ .

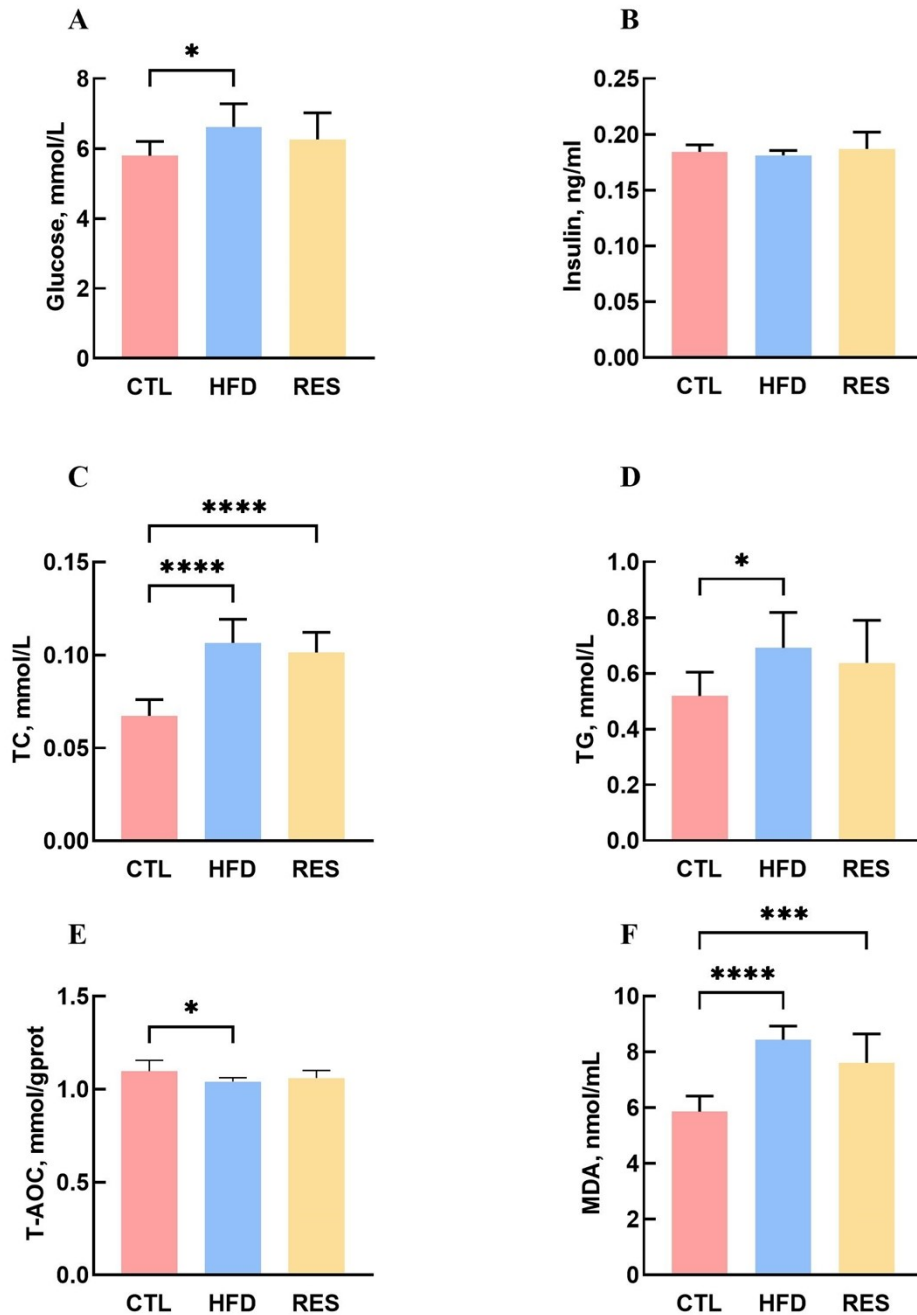

10

Sup

11 **plementary Fig 2.** Effect of resveratrol on serum biochemical indicators in short-term high-fat diet

12 induced mice. Serum levels of glucose (A), insulin (B), total cholesterol (TC) (C), triglyceride (TG)

13 (D), the total antioxidant capacity (T-AOC) (E) and malondialdehyde (MDA) (F) in short-term high-  
 14 fat diet induced mice. CTL, a control group; HFD, a high-fat diet; RES, a high-fat diet containing  
 15 500 mg/kg resveratrol. \* $P<0.05$ , \*\* $P<0.01$ , \*\*\* $P<0.001$ , \*\*\*\* $P<0.0001$ . n=9.

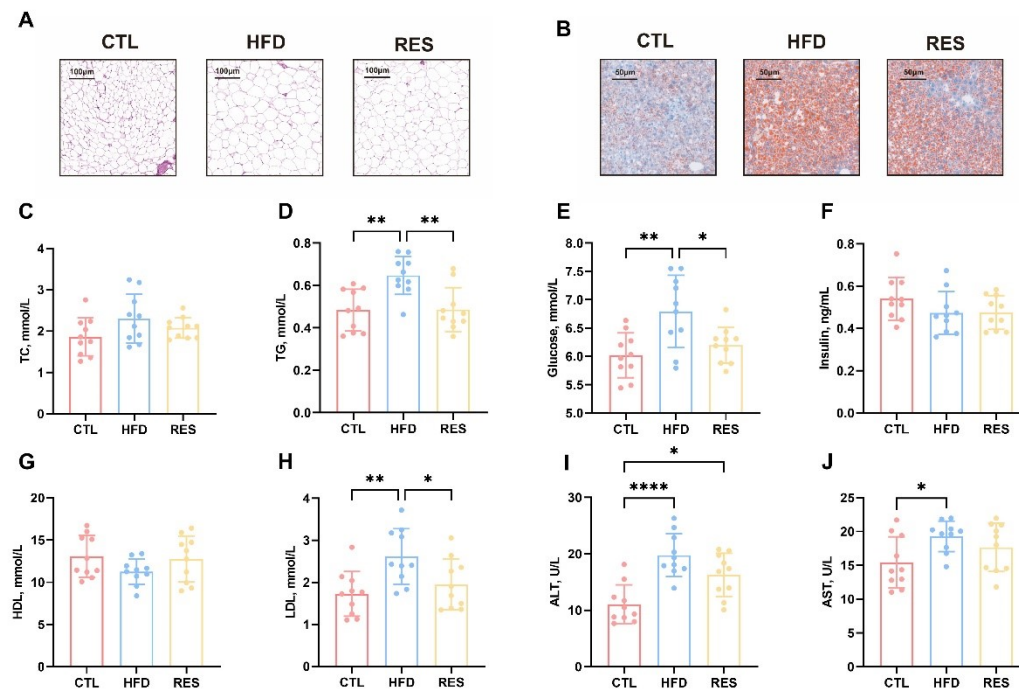

16 **Supplementary Fig 3.** Effect of resveratrol on fat deposition and serum biochemical indicators in  
 17 long-term high-fat diet induced mice. Effect of resveratrol on fat deposition and serum biochemical  
 18 indicators of long-term high-fat diet induced mice. The abdominal fat HE staining (A) and oil red  
 19 O staining (B) in long-term high-fat diet induced mice, serum levels of total cholesterol (TC) (C),  
 20 triglyceride (TG) (D), glucose (E), insulin (F), low-density lipoprotein (LDL) (G), high-density  
 21 lipoprotein (HDL) (H), alanine aminotransferase (ALT) (I), and aspartate aminotransferase (AST)  
 22 (J) in long-term high-fat diet induced mice. CTL, a control group; HFD, a high-fat diet; RES, a  
 23 high-fat diet containing 500 mg/kg resveratrol. \* $P<0.05$ , \*\* $P<0.01$ , \*\*\* $P<0.001$ , \*\*\*\* $P<0.0001$ .  
 24 n=10.

25

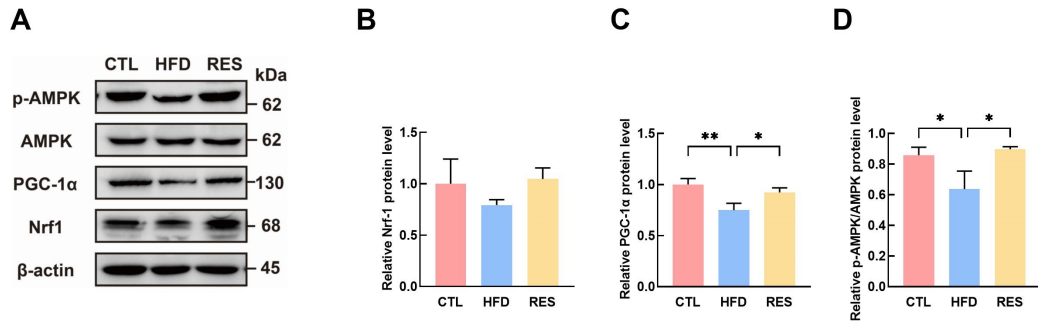

26

27 **Supplementary Fig 4.** Effect of resveratrol on mitochondrial biogenesis, function and energy

28 metabolism in uterus of short-term high-fat diet induced mice. Effect of resveratrol on mitochondrial

29 biogenesis, function, and energy metabolism in uterus of short-term high-fat diet induced mice.

30 Effect of resveratrol on the protein expression levels of phosphorylated adenosine 5'-

31 monophosphate (AMP)-activated protein kinase (p-AMPK), peroxisome proliferator-activated

32 receptor  $\gamma$  coactivator-1 $\alpha$  (PGC-1 $\alpha$ ), and nuclear respiratory factors-1 (Nrf-1) (A-D) in short-term

33 high-fat diet induced mice uterus. CTL, a control group; HFD, a high-fat diet; RES, a high-fat diet

34 containing 500 mg/kg resveratrol. \* $P < 0.05$ , \*\* $P < 0.01$ , \*\*\* $P < 0.001$ , \*\*\*\* $P < 0.0001$ . n=3.

35

36
